# Supplementary material
Source: publisher figshare collection journal article supplement (https://tandf.figshare.com/ndownloader/files/17915393)
Supplement: Supplementary file 1 [file 17915393]

Scalable synthesis of multi-substituted aryl-phosphonates: exploring the limits of isoretical expansion and the synthesis of new triazene-based phosphonates

Derek Barbeea and Andrew R. Barrona,b,c*

aDepartment of Materials Science and Nanoengineering, Rice University, Houston, Texas 77005, USA

bDepartment of Chemistry, Rice University, Houston, Texas 77005, USA

cEnergy Safety Research Institute, Swansea University, Bay Campus, Swansea, SA1 8EN, Wales, UK

Email: [arb@rice.edu](mailto:arb@rice.edu)

**Supplemental Materials**

***IR data***

**1,3,5-*Tris*(4-bromophenyl)benzene (TBPB, 3a).** FTIR (cm-1): 3045, 1591, 1493, 1648, 1589, 1488, 1440, 1365, 1257, 1238, 1200, 1064, 1005, 942, 869, 805, 690.

***Tris*(4’-bromo-[1,1’-biphenyl]-4-yl)-1,3,5-benzene (TBBPB) (5a).** FTIR (cm-1): 3017, 1601, 1491, 1443, 1194, 1005, 857, 802, 720.

**(*E*)-1,3-*bis*(4’-bromo-[1,1’-biphenyl]-4-yl)but-2-en-1-one (DBBPE) (6a).** FTIR (cm-1): 3094, 3081, 1642, 1590, 1455, 1365, 1311, 1252, 1176, 1047, 1010, 981, 912, 857, 803, 739.

**1,3,5-*tris*(4-bromo-2-methylphenyl)triazine (8a).** FTIR (cm-1): 3005, 2945, 2371, 2347, 1593, 1559, 1517, 1430, 1389, 1342, 1253, 1195, 1150, 1084, 1027, 866, 805.

**4,4’-bis(diisopropyl phosphonate) biphenyl (1b).** FTIR (cm-1): 2973, 2944, 2891, 2355, 2340, 1596, 1384, 1249, 1167, 1139, 1096, 961, 876, 813, 764, 748, 700.

**Diisopropyl (*E*)-(4’-(4-(4’-(diisopropoxyphosphoryl)-[1,1’-biphenyl]-4-yl)-4-oxobut-2-en-2-yl)-[1,1’-biphenyl]-4-yl)phosphonate (6b).** FTIR (cm-1): 2991, 2937, 2883, 1638, 1583, 1409, 1362, 1225, 1155, 1107, 1081, 963, 867, 809, 741, 679.

**Hexaisopropyl((1,3,5-triazine-2,4,6-triyl)*tris*(([1,1’-biphenyl]-4’-4-diyl)))*tris*(phosphonate) (7b).** FTIR (cm-1): 2988, 2941, 2873, 1500, 1361, 1243, 1175, 1138, 1096, 1058, 968, 882, 804, 775, 694.

**1,3,5-*tris*(diisopropyl 2-methylphenyl-4-phosphonato)triazine (8b).** FTIR (cm-1): 3015, 2959, 2892, 2209, 1520, 1465, 1396, 1250, 1177, 1148, 1103, 963, 905, 842, 789, 708.

**Biphenyl-4,4’-di(phosphonic acid) (1c).** FTIR (cm-1): 3500-2000, 2365, 2343, 1594, 1130, 1117, 1000, 93, 809, 705. CHN analysis calcd. (%): C 45.86, H 3.82; found: C 45.14, H 3.80.

**3,3’,5,5’-Tetra(phosphoric acid)-1,1’-biphenyl (2c).** FTIR (cm-1): 3750-3350, 3008, 2953, 2903, 1428, 1345, 1211, 1141, 1103, 1063, 965, 850, 795, 717, 656. CHNS analysis calcd. (%): C 30.38, H 2.95; found C 30.47, H 2.92.

**1,3,5-Benzene-tri-*p*-phenylphosphonic acid (3c).** FTIR (cm-1): 3500-2000, 2357, 2325, 1204, 1111, 1055, 99, 937, 795, 730, 681. CHNS analysis calcd (%): C 22.64, H 2.83; found: C 22.30, H 2.84.

**1,3,5-*Tris*(phenyl-4-phosphonic acid)benzene (BBTPA) (4c).** FTIR (cm-1): 3600-2000, 2375, 2339, 1590, 1133, 1051, 982, 919, 815, 721, 686.

**((1,3,5-triazine-2,4,6-triyl)*tris*(3-methylbenzene-4,1,-diyl))*tris*(phosphonic acid) (MBTTPA) (8c).** FTIR (cm-1): 3700-2000, 2988, 2939, 1560, 1503, 1375, 1341, 1141, 1099, 977, 883, 807, 793, 681.

***Computational data***

**Table S 1:** Selected calculated structural parameters for R(CH3)C=C(H)C(O)R intermediate using RB3LYP method and 6-31G** basis set.

| R | O=C (Å) | C=C (Å) | O…Me (Å) | O=C-C (°) | C-C=C (°) | C=C-C (°) | Σ(X-C-C) (°) |
| --- | --- | --- | --- | --- | --- | --- | --- |
| Ph | 1.26293 | 1.3659 | 2.81671 | 122.03680 | 125.88735 | 123.34808 | 371.27223 |
| Bi-phenyl | 1.26346 | 1.36566 | 2.85974 | 122.26606 | 126.43491 | 123.52476 | 372.22573 |

**Table S 2:** Calculated total energy (Hartree) for optimized structures using RB3LYP method and 6-31G** basis set.a

| R | RC(O)CH3 | R(CH3)C=C(O)R | C6H3R3 |
| --- | --- | --- | --- |
| Ph | -384.814612 | -693.210538 | -925.24701 |
| Bi-phenyl | -615.827943 | -1155.237226 | -1618.255426 |

a Energy for H2O = -76.401391 Hartree.


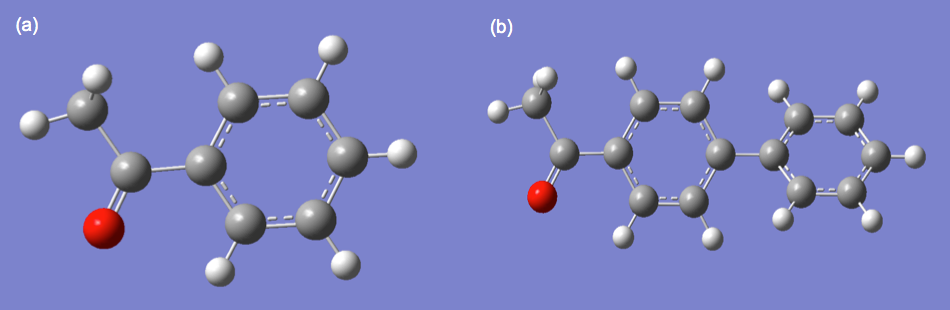


**Figure S 1:** Calculated structures of (a) PhC(O)CH3 and (b) (biphen)C(O)CH3. Calculations of all structures was carried out at the RB3LYP level with the 6-31G** basis set


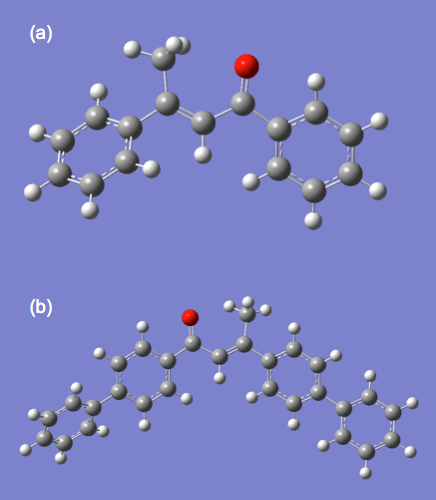


**Figure S 2.** Calculated structures of (a) Ph(CH3)C=C(H)C(O)Ph and (b) (biphen)(CH3)C=C(H)C(O)(biphen). Calculations of all structures was carried out at the RB3LYP level with the 6-31G** basis set.


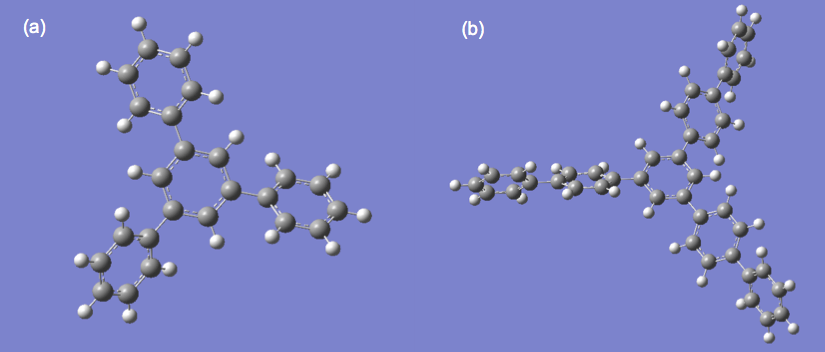


**Figure S 3:** Calculated structures of (a) C6H3Ph and (b) C6H3(biphen). Calculations of all structures was carried out at the RB3LYP level with the 6-31G** basis set.

**Table S 3:** Calculated total energy (Hartree) for optimized structures using RB3LYP method and 6-31G** basis set.

| Entry | R | R-C≡N | N3C3R3 |
| --- | --- | --- | --- |
| 1 | Ph | -324.423785 | -973.337598 |
| 2 | Bi-phenyl | -555.437023 | -1666.377571 |


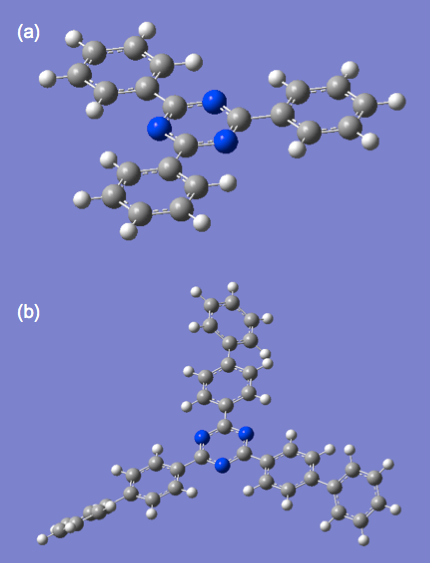


**Figure S 4:** Calculated structures of (a) C3N3Ph and (b) C3N3(biphen). Calculations of all structures was carried out at the RB3LYP level with the 6-31G** basis set.


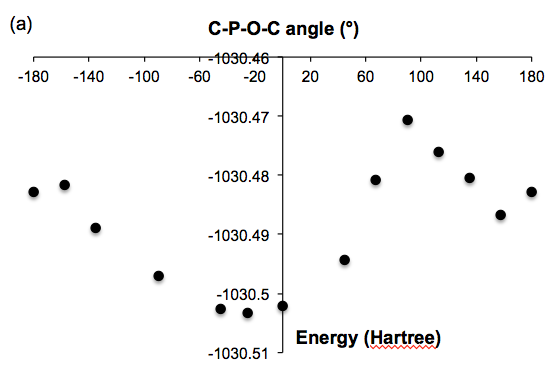

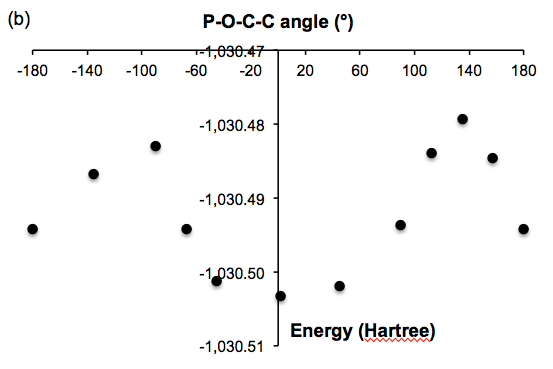


**Figure S 5:** Plot of calculated total energy (Hartree) of C6H5P(O)(OiPr)2 as a function of the (a) C-P-O-C and (b) C-C-P=O torsional angle.
